# Supplementary material
Source: PubMed Central journal article supplement (PMC1805533)

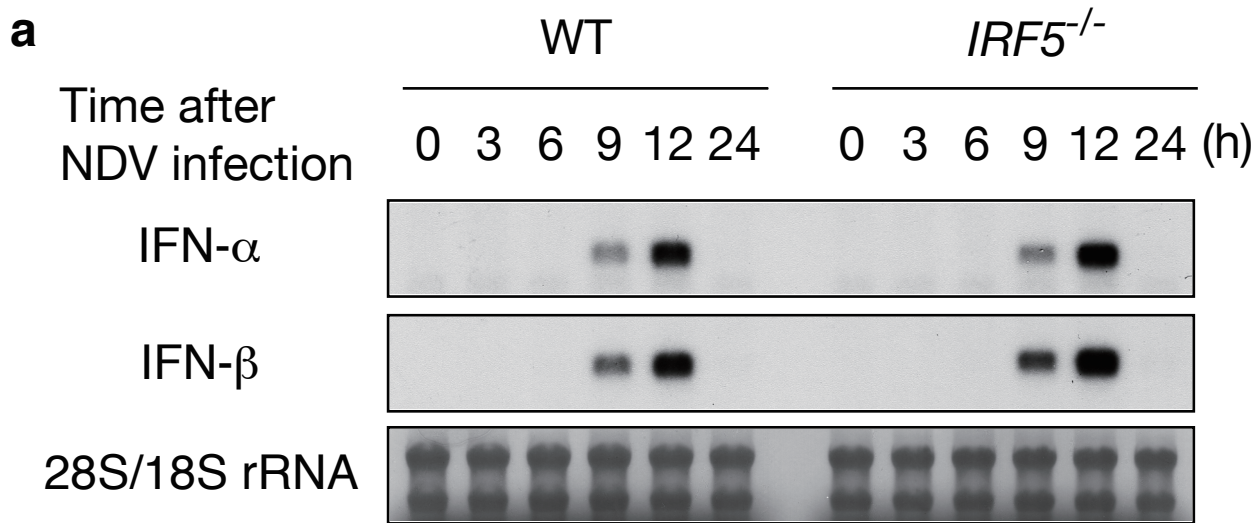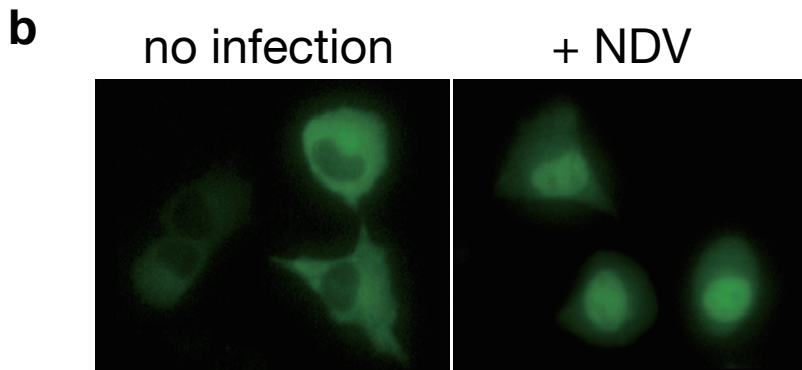

Supplement: pnas_0611559104_1.pdf [file pnas_0611559104_1.pdf]
